# Supplementary material
Source: PubMed Central journal article supplement (PMC6820348)
Supplement: NIHMS1055054-supplement-Supplemental.pdf [file NIHMS1055054-supplement-Supplemental.pdf]

## SUPPLEMENTARY APPENDIX

**Table S1. Pharmacokinetic Parameters**

| Table 3 Pharmacokinetic Parameters |              |                          |                          |                             |               |                    |             |                |
|------------------------------------|--------------|--------------------------|--------------------------|-----------------------------|---------------|--------------------|-------------|----------------|
| SUBJ ID                            | Cmax (ug/mL) | AUCall dose1 (day*ug/mL) | AUCINF dose1 (day*ug/mL) | AUCall dose 1,2 (day*ug/mL) | CLss (mL/day) | Accumulation Index | T1/2 (day)  | r <sup>2</sup> |
| 101-02                             | 464          | 3397                     | 6500                     | 24431                       | 295           | 1.92               | 13.2        | 0.893          |
| 102-02                             | 215          | 1772                     | 3051                     | 3701                        | 566           | 1.73               | 11.3        | 0.967          |
| 103-02                             | 331          | 2620                     | 4543                     | 2696                        | 383           | 1.75               | 11.4        | 0.943          |
| 104-02                             | 297          | 2065                     | 3432                     | 7830                        | 462           | 1.59               | 9.8         | 0.913          |
| 105-01                             | 387          | 2391                     | 4142                     | 10409                       | 417           | 1.73               | 11.3        | 0.807          |
| 107-01                             | 633          | 3066                     | 5675                     | 11055                       | 313           | 1.85               | 12.5        | 0.684          |
| 108-02                             | 480          | 3908                     | 6961                     | 11253                       | 256           | 1.76               | 11.6        | 0.427          |
| 109-02                             | 362          | 2101                     | 4099                     | 10834                       | 475           | 1.91               | 13.1        | 0.915          |
| 110-01                             | 506          | 3760                     | 5428                     | 18081                       | 266           | 1.45               | 8.3         | 0.979          |
| 111-02                             | 449          | 3121                     | 4360                     | 12876                       | 321           | 1.41               | 7.8         | 0.976          |
| 112-02*                            | 397          | 2611                     | 9514                     | 10360                       | 382           | 3.09               | 24.9        | 0.180          |
| 113-02                             | 726          | 3818                     | 8481                     | 16150                       | 262           | 2.27               | 16.7        | 0.669          |
| <b>N</b>                           | <b>12</b>    | <b>12</b>                | <b>11</b>                | <b>12</b>                   | <b>11</b>     | <b>11</b>          | <b>11</b>   | <b>11</b>      |
| <b>Mean</b>                        | <b>437</b>   | <b>2886</b>              | <b>5515</b>              | <b>11640</b>                | <b>365</b>    | <b>1.761</b>       | <b>11.5</b> | <b>0.834</b>   |
| <b>SD</b>                          | <b>141</b>   | <b>735</b>               | <b>2010</b>              | <b>5945</b>                 | <b>103</b>    | <b>0.240</b>       | <b>2.5</b>  | <b>0.174</b>   |
| <b>Median</b>                      | <b>423</b>   | <b>2843</b>              | <b>4986</b>              | <b>10945</b>                | <b>321</b>    | <b>1.746</b>       | <b>11.4</b> | <b>0.913</b>   |

\*Terminal phase parameters could not be calculated (Regression RSQ < 0.2). Individual estimates reported but not included in means

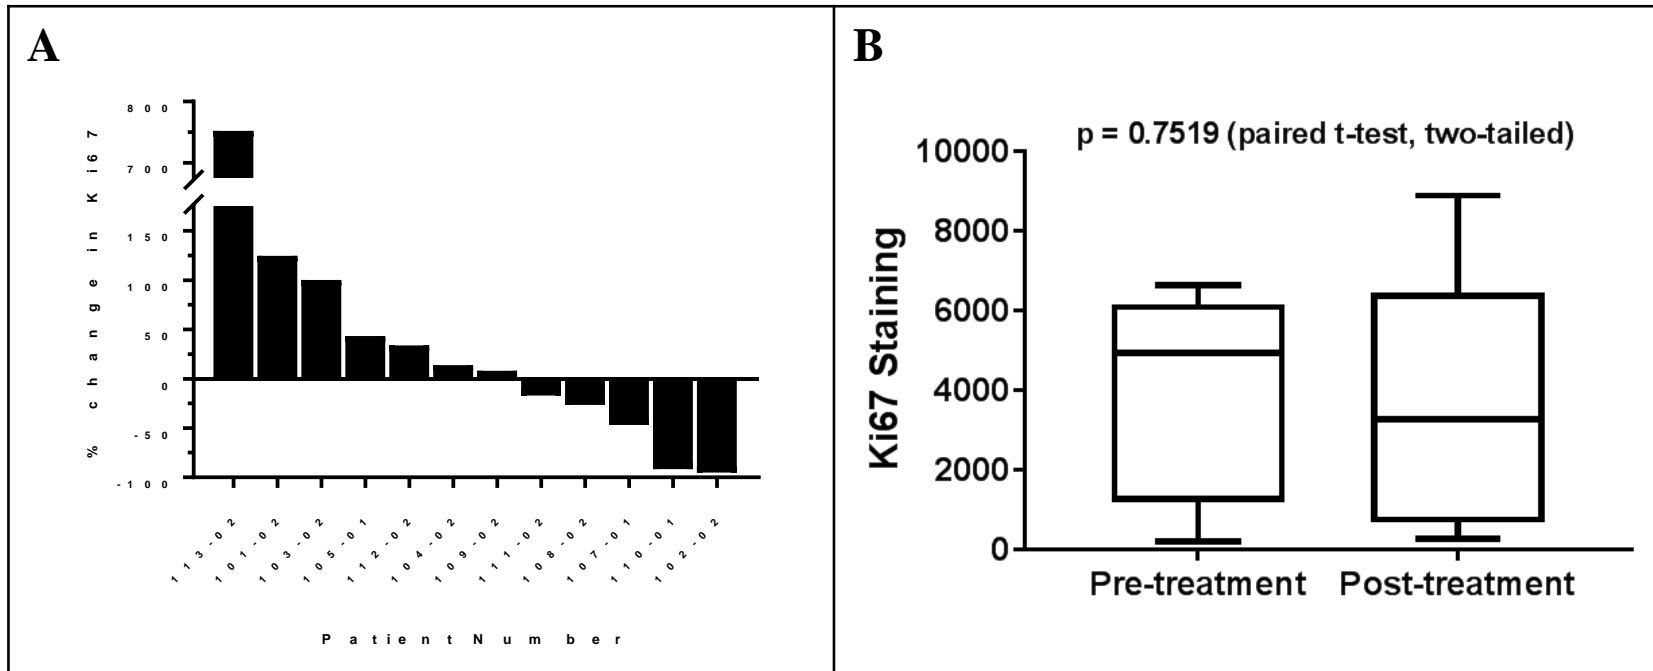

**Figure S1.** Ki67 Expression by IHC. (A) Change in Ki67 level in individual patient tumor samples and (B) mean Ki67 levels for all tumor samples (n=12) before and after CDX-3379 treatment.

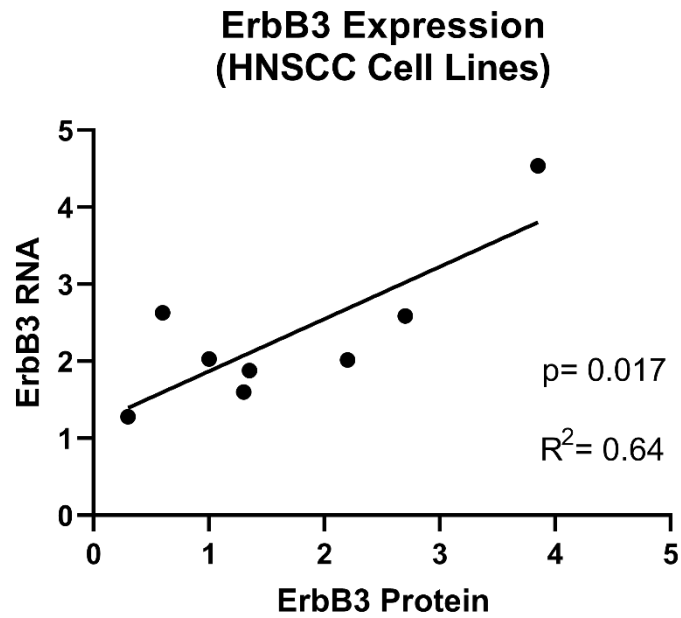

Figure S2: ErbB3 RNA and protein expression are significantly correlated. ErbB3 RNA and total protein were evaluated in a panel of 8 HNSCC cell lines. Linear correlation analysis reveals the two variables are significantly associated. The correlation was performed by linear regression (GraphPad Prism 7.02).

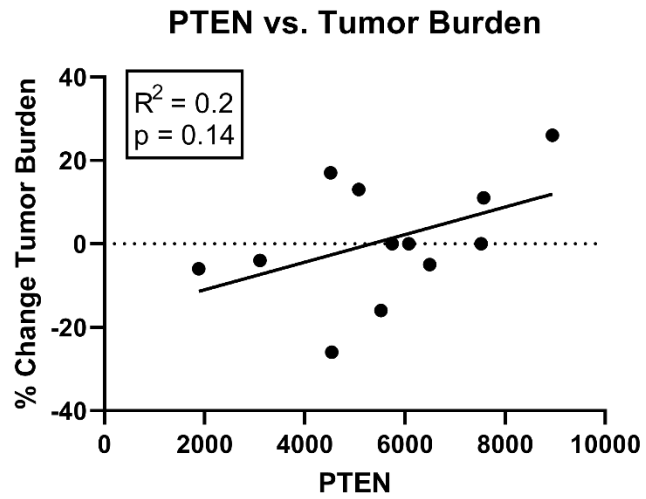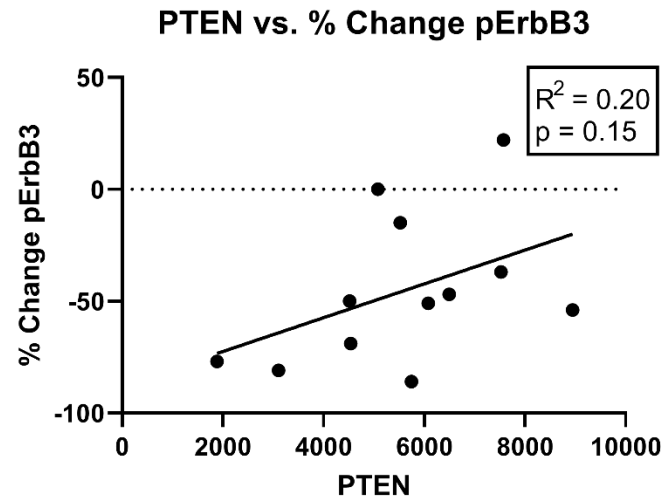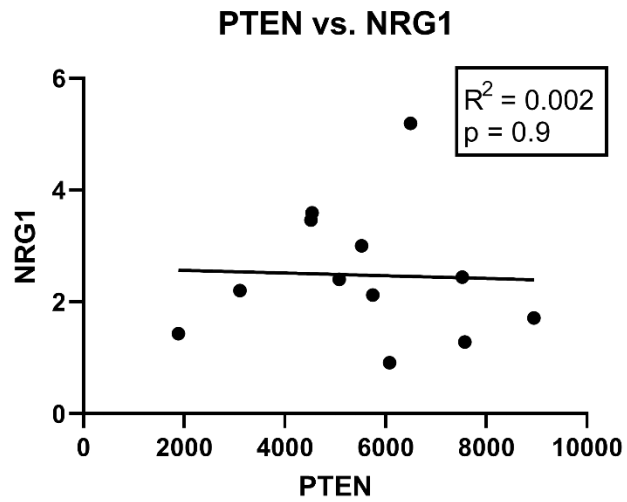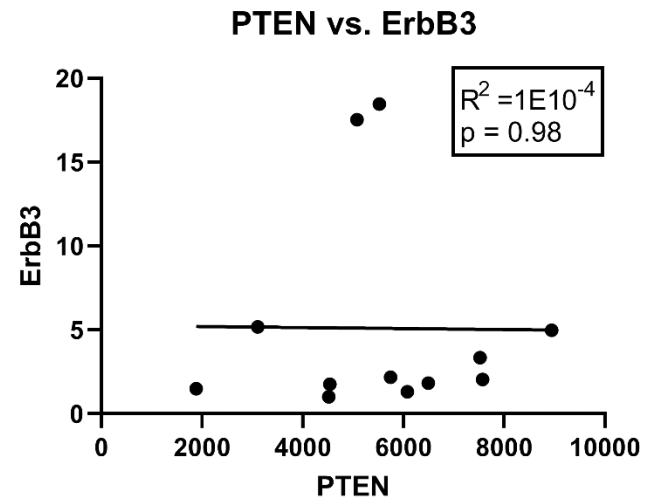

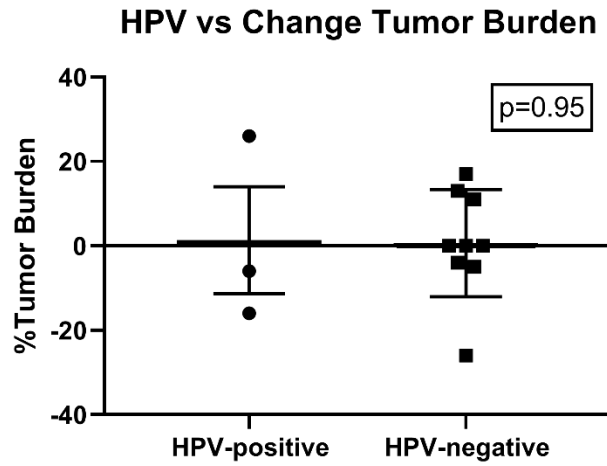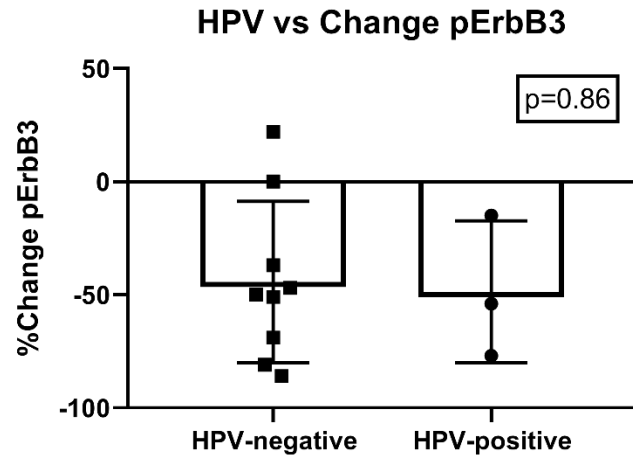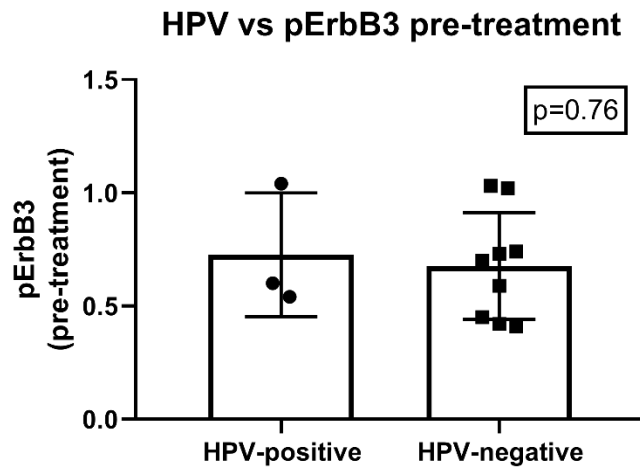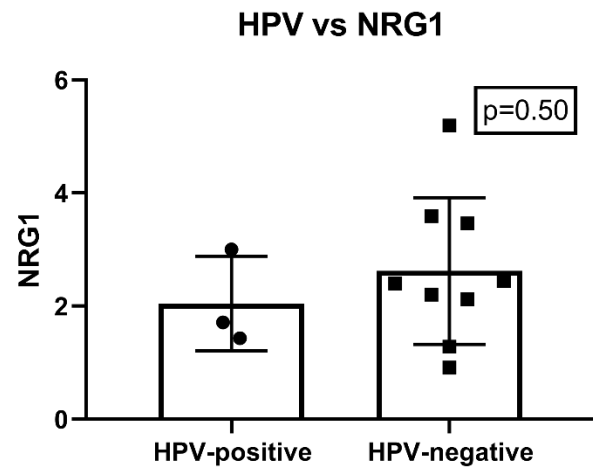

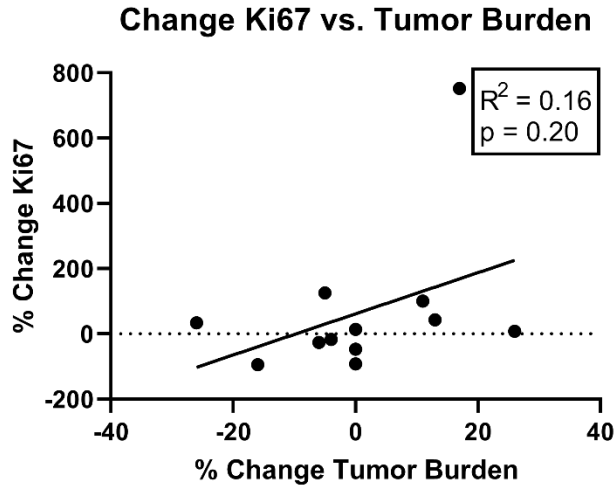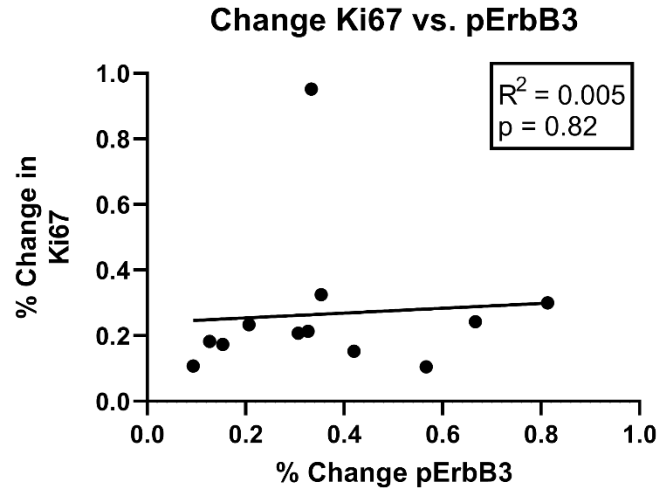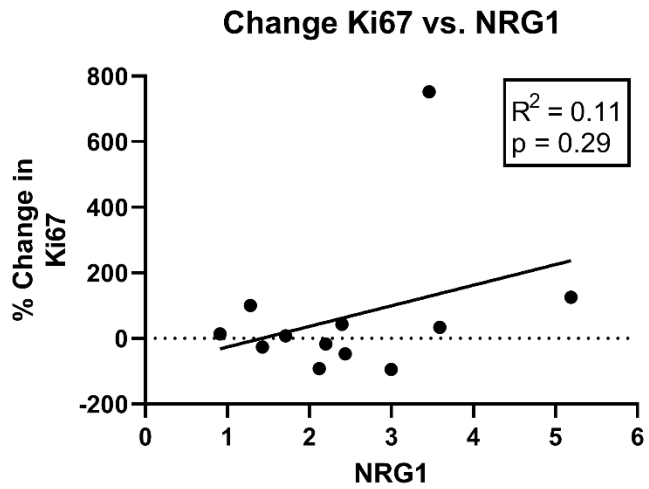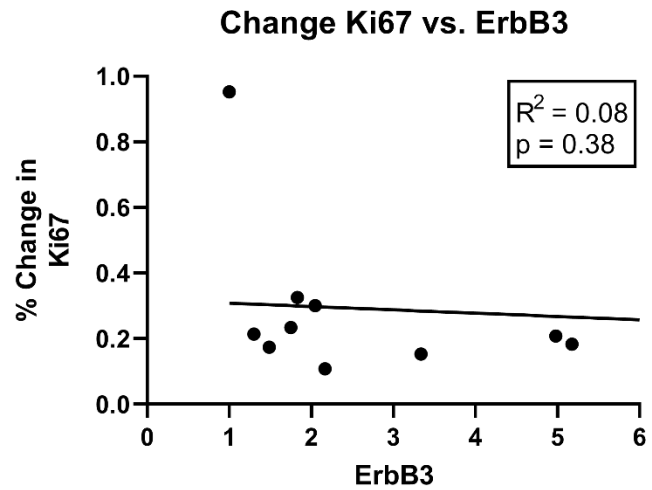

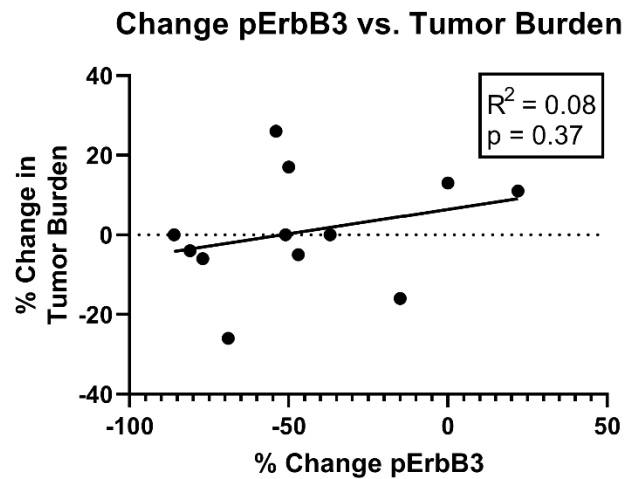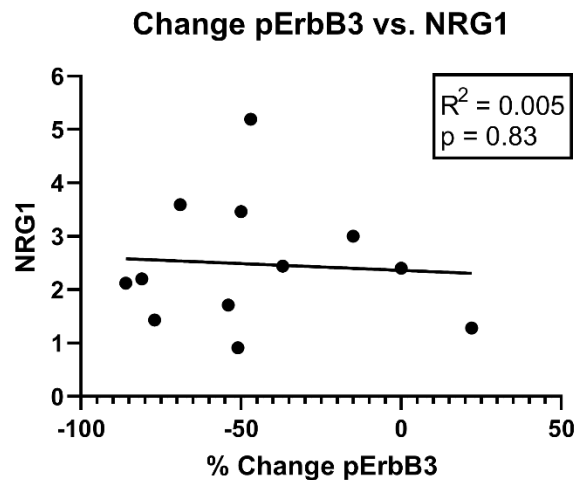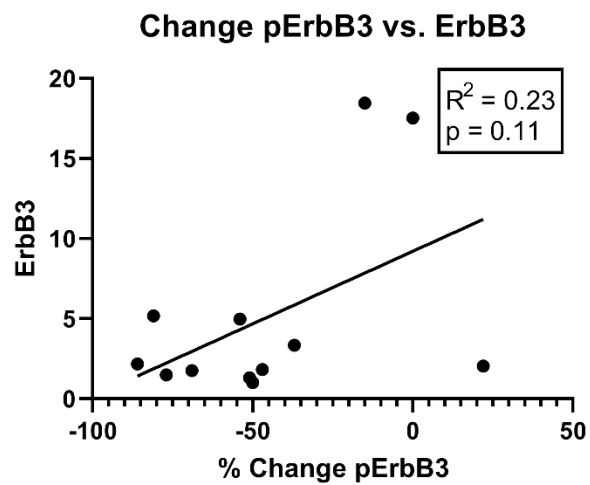

**Figure S3.** Statistical correlations between biomarker subsets. Correlations were performed by linear regression and p-values were calculated by unpaired, two-tailed t-tests (GraphPad Prism 7.02). Tumor burden represents percent change from baseline in the sum of longest diameters of target lesion(s) for each study patient. Change in Ki67 represents the percent change in Ki67 level by IHC (AQUA®) from baseline after CDX-3379 treatment in individual patient tumor samples. NRG1, NRG2, ErbB3, and PTEN assessed using post-treatment tumor resection samples for all patients except 102-02, 103-02, and 104-02 (pre-treatment biopsies were evaluated). mRNA expression levels of NRG1, and ErbB3 were determined by quantitative RNAScope® assays. mRNA expression levels were calculated as previously described (Alvarado, D., et al., ErbB activation signatures as potential biomarkers for anti-ErbB3 treatment in HNSCC. PLoS One, 2017. 12(7): p. e0181356; Bordeaux, J.M., et al., Quantitative in situ measurement of estrogen receptor mRNA predicts response to tamoxifen. PLoS One, 2012. 7(5): p. e36559). PTEN expression was assessed by IHC (AQUA®).
